# Supplementary material for: Exploring Meal and Snacking Behaviour of Older Adults in Australia and China
Source: MDPI journal article supplement (doi:10.3390/foods9040426), 2020-04-03
Supplement: s1 [file s1]

## Supplementary Materials:

**Table S1:** Moderator guide used for group discussion in qualitative multivariate analysis (QMA).

| STAGE                                 | DURATION   | DESCRIPTION                                                                                                                                                                                                    | OBJECTIVE                                                                  | KEY QUESTIONS/POINTS                                                                                                                                                                                                                                                                                                                                                                                                                                                                                                                                                                                                                                                                                                                                       |
|---------------------------------------|------------|----------------------------------------------------------------------------------------------------------------------------------------------------------------------------------------------------------------|----------------------------------------------------------------------------|------------------------------------------------------------------------------------------------------------------------------------------------------------------------------------------------------------------------------------------------------------------------------------------------------------------------------------------------------------------------------------------------------------------------------------------------------------------------------------------------------------------------------------------------------------------------------------------------------------------------------------------------------------------------------------------------------------------------------------------------------------|
| Introduction                          | 10 minutes | <ul style="list-style-type: none"> <li>• Researchers and project introduction</li> <li>• Paperwork completion (consent form, PLS form)</li> <li>• Honesty – no right or wrong answers</li> </ul>               | To meet the respondent and set the scene for the discussion                | <p>Snacks Definition: these are foods that can be eaten in place of, or in between meals, that are convenient because they can be quick and easy to eat. The term “snack food” does not only apply to some of the newer products such as potato crisps, but it also includes many traditional food items [24].</p>                                                                                                                                                                                                                                                                                                                                                                                                                                         |
| 5Ws (when, what, why, where who with) | 40 minutes | <ul style="list-style-type: none"> <li>• Introduce table activity</li> <li>• Ask for opinions</li> <li>• Complete the table</li> </ul>                                                                         | Investigate why they are snacking (fuel, treat, boost)                     | <p>Key Words to Describe Snacks:</p> <ul style="list-style-type: none"> <li>• For Fuel: Nourish, Satisfy, Sustain</li> <li>• For Treat: Delight, Distraction, Sensation</li> <li>• For Boost: Mental, Refreshing</li> </ul>                                                                                                                                                                                                                                                                                                                                                                                                                                                                                                                                |
| Snacks Tasting and Mapping            | 60 minutes | <ul style="list-style-type: none"> <li>• Introduce mapping activity and usage of pictures to describe snacking preferences</li> <li>• Evaluate one product at a time, allow everyone to participate</li> </ul> | To measure snacking behaviour, needs and wants from food and meat products | <ul style="list-style-type: none"> <li>• Cocktail sausage is our reference point for mapping. Map it first and place it in the middle.</li> <li>• Track if they have a variation for fruit, veggie and cracker.</li> <li>• When do you snack?</li> <li>• How do you describe its texture (crunchy, springy, firm, grainy)?</li> <li>• How do you describe its flavour (bland, tasty, sour, salty)?</li> <li>• How do you describe its appearance (attractive, flat, lumpy)?</li> <li>• Which product did you prefer?</li> <li>• What make it better over the other types of snacks?</li> <li>• Is healthiness an important factor for you to choose a snack? why?</li> <li>• Is the protein content of a snack an important factor to you? why?</li> </ul> |

---

|              |            |                                                                                                   |                                                                                                                                                                                                 |
|--------------|------------|---------------------------------------------------------------------------------------------------|-------------------------------------------------------------------------------------------------------------------------------------------------------------------------------------------------|
|              |            |                                                                                                   | <ul style="list-style-type: none"> <li>• At what time of the day do you consume these products? why?</li> <li>• Do you have difficulty eating any of these products? Which one? why?</li> </ul> |
|              |            |                                                                                                   |                                                                                                                                                                                                 |
| Compensation | 10 minutes | <ul style="list-style-type: none"> <li>• Gift handover</li> <li>• Gratitude expression</li> </ul> | To compensate respondent for their support and time                                                                                                                                             |

---

**Table S2:** Lexicon for sensory attributes of meat products. Derived from [51].

| FLAVOUR     | APPEARANCE  | TEXTURE     | AROMA     |
|-------------|-------------|-------------|-----------|
| Bland       | Off-putting | Dry         | Rancid    |
| Contrast    | Pale        | Simple      | Fermented |
| Fatty       | Crumbly     | Chewy       | Smoky     |
| Sour        | Dry         | Crumbly     | Fatty     |
| Bitter      | Fatty       | Tough       | Rotten    |
| Rancid      | Slimy       | Lumpy       | Rubbery   |
| Hot         | Lumpy       | Mushy       | Beefy     |
| Spicy       | Thick       | Sticky      | Fresh     |
| Artificial  | Soft        | Thick       | Cooked    |
| Salty       | Juicy       | Hard to eat | Spicy     |
| Sweet       | Hot         | Easy to eat | Meaty     |
| Umami       | Healthy     | Tender      | Umami     |
| Fresh       | Colourful   | Springy     | Other     |
| Sharp       | Appetising  | Juicy       |           |
| Tasty       | Other       | Crispy      |           |
| No contrast |             | Complex     |           |
| Multi-taste |             | Soft        |           |
| Other       |             | Other       |           |

**Table S3:** Conjoint design for product concepts of **beef** (36 levels).

| Category       | Attribute 1 - Product uniqueness                                                                                                                                               | Attribute 2 - Packaging uniqueness                                                                                              | Attribute 3 - Ingredient uniqueness                                                                                                                                            | Attribute 4 - Provenance process                                                                                                           | Attribute 5 - Channel                                     | Attribute 6 - Occasion                                                   |
|----------------|--------------------------------------------------------------------------------------------------------------------------------------------------------------------------------|---------------------------------------------------------------------------------------------------------------------------------|--------------------------------------------------------------------------------------------------------------------------------------------------------------------------------|--------------------------------------------------------------------------------------------------------------------------------------------|-----------------------------------------------------------|--------------------------------------------------------------------------|
| <b>BEEF</b>    |                                                                                                                                                                                |                                                                                                                                 |                                                                                                                                                                                |                                                                                                                                            |                                                           |                                                                          |
| <b>Level 1</b> | Unique breeds like older Longhorns that have a chance to develop more flavour, with a delicate beefy flavour and a slightly acid finish without having a very high fat content | Map tray sealed on top clear with loin cut<br> | Fresh Australian beef                                                                                                                                                          | Australian meat packaged and prepared in China                                                                                             | Available at all stores where food and beverages are sold | Something I would have by myself at home                                 |
| <b>Level 2</b> | Beef stir fry, cut in just the right size                                                                                                                                      | Map tray sealed on top black with loin cut<br> | Certified organic Australian beef                                                                                                                                              | Australian meat packaged and prepared in Australia                                                                                         | Available at my local store                               | Something I would share with friends and family                          |
| <b>Level 3</b> | Slow cooked beef with onion and gravy, just heat and eat                                                                                                                       | Map tray seal with shiny black tray<br>       | Traditional Australian Breeds like Brahman or Angus                                                                                                                            | Authenticated, traceable back to the farm                                                                                                  | Available in the supermarket                              | Something I would share when I am out with friends and family            |
| <b>Level 4</b> | Cuts like heart, liver, kidney... full of nutrition                                                                                                                            | Darfresh Vacuum sealed, green tray<br>       | Unique breeds like older Longhorns that have a chance to develop more flavour, with a delicate beefy flavour and a slightly acid finish without having a very high fat content | Aged using Traditional craftsmanship practices like dry aging for 35 days to tenderize and create a distinctive melt in your mouth flavour | Available at a small market / specialty store             | Something I would have for a special occasion like a festival or holiday |

|                |                                                |                                                                                                                                                                                  |                                                                                                                                         |                                                                                                                        |                                            |                                                                   |
|----------------|------------------------------------------------|----------------------------------------------------------------------------------------------------------------------------------------------------------------------------------|-----------------------------------------------------------------------------------------------------------------------------------------|------------------------------------------------------------------------------------------------------------------------|--------------------------------------------|-------------------------------------------------------------------|
| <b>Level 5</b> | Classic Beef Roast cut and tied, ready to cook | <p>Matt black flat tray with tiny lip Darfresh vacuum, meat higher than lip with gold base</p>  | Lean heart healthy beef, raised to have monosaturated fats to lower your blood pressure and cholesterol, but still have lots of flavour | Raised on a small family farm, grass feed using biodiverse pastures, hormone free, using sustainable farming practices | Available online from a Chinese seller     | Something I would have for a special celebration                  |
| <b>Level 6</b> | Beef sirloin, tender and juicy every time      | <p>Butcher board square wood with meat on top</p>                                               | Premium pasture fed beef from Blackmore's Wagyu, Cape Grim, or Minderoo                                                                 | Highest quality premium meat, recommended by celebrities, and chefs as their favourite                                 | Available online from an Australian seller | Something I would have/give to my partner to show how much I care |

**Table S3 cont.:** Conjoint design for product concepts of **pork** (36 levels).

| Category       | Attribute 1 - Product uniqueness           | Attribute 2 - Packaging uniqueness                                                                                              | Attribute 3 - Ingredient uniqueness         | Attribute 4 - Provenance process                          | Attribute 5 - Channel                                         | Attribute 6 - Occasion                                                   |
|----------------|--------------------------------------------|---------------------------------------------------------------------------------------------------------------------------------|---------------------------------------------|-----------------------------------------------------------|---------------------------------------------------------------|--------------------------------------------------------------------------|
| <b>PORK</b>    |                                            |                                                                                                                                 |                                             |                                                           |                                                               |                                                                          |
| <b>Level 1</b> | Pork loin chop                             | Map tray sealed on top clear with loin cut<br>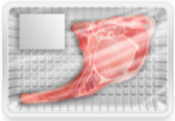 | Australian pork                             | Australian pork packaged and prepared in China            | Available at all stores where food and beverages are sold     | Something I would have by myself at home                                 |
| <b>Level 2</b> | Australian pork loin chop                  | Map tray sealed on top green with loin cut<br> | Fresh Australian pork, lean and heart smart | Australian pork packaged and prepared in Australia        | Available at my local store                                   | Something I would share with friends and family                          |
| <b>Level 3</b> | Fresh Australian pork loin chop            | Map tray sealed on top shiny black tray<br>    | Healthy, natural Australian pork            | Fresh quality pork, 100% Australian farmed and butchered  | Available online with little information on country of origin | Something I would share when I am out with friends and family            |
| <b>Level 4</b> | Tender and juicy Australian pork loin chop | Darfresh vacuum sealed, green tray<br>       | Certified free range Australian pork        | Traditional European Berkshire breed. Farmed in Australia | Available at my Supermarket                                   | Something I would have for a special occasion like a festival or holiday |

|                |                                                       |                                                                                                                                                                              |                                                                |                                                                                                  |                                                                     |                                                                   |
|----------------|-------------------------------------------------------|------------------------------------------------------------------------------------------------------------------------------------------------------------------------------|----------------------------------------------------------------|--------------------------------------------------------------------------------------------------|---------------------------------------------------------------------|-------------------------------------------------------------------|
| <b>Level 5</b> | Authentic Australian pork loin chop                   | Matt black flat tray with tiny lip Darfresh vacuum, meat higher than lip with gold base<br> | Locally sourced, tasty Australian pork                         | Australian pork raised on a small family farm, hormone free, using sustainable farming practices | Available online, fully authenticated, traceable back to local farm | Something I would have for a special celebration                  |
| <b>Level 6</b> | Authentic, tender and juicy Australian pork loin chop | Butcher board square wood with meat on top<br>                                              | Traditional Australian pork farmed using sustainable practices | Highest quality Australian premium pork, recommended by butchers and chefs as their favourite    | Only available from select butchers and markets                     | Something I would have/give to my partner to show how much I care |

**Table S3 cont.:** Conjoint design for product concepts of cheese (36 levels).

| Category       | Attribute 1 - Product uniqueness | Attribute 2 - Packaging uniqueness                                                                                             | Attribute 3 - Ingredient uniqueness                                   | Attribute 4 - Provenance process                | Attribute 5 - Channel                                     | Attribute 6 - Occasion                                                   |
|----------------|----------------------------------|--------------------------------------------------------------------------------------------------------------------------------|-----------------------------------------------------------------------|-------------------------------------------------|-----------------------------------------------------------|--------------------------------------------------------------------------|
| <b>CHEESE</b>  | Premium quality                  | Slice cheese plastic individual wrap<br>      | Made with fresh Australian milk                                       | Prepared in a modern clean facility             | Available at all stores where food and beverages are sold | Something I would have by myself at home                                 |
| <b>Level 1</b> |                                  |                                                                                                                                |                                                                       |                                                 |                                                           |                                                                          |
| <b>Level 2</b> | Certified organic                | Cheese sticks<br>                             | Made with fresh Chinese milk                                          | Authenticated, traceable back to the dairy farm | Available at my local store                               | Something I would share with friends and family                          |
| <b>Level 3</b> | Flavourful cheese                | Laughing cow triangle foil wrap in wheel<br> | Made with Australian bush ingredients to enhance health and wellbeing | Hand crafted by a chef with a unique recipe     | Available in the supermarket                              | Something I would share when I am out with friends and family            |
| <b>Level 4</b> | Lightly flavoured cheese         | Baby bell wax peel<br>                      | Made with fresh Australian A2 high protein milk                       | Handcrafted using traditional methods           | Available at a small market / specialty store             | Something I would have for a special occasion like a festival or holiday |



|                |                                                              |                                                                                                                                                |                                                                 |                                                                                                                                           |                                            |                                                                   |
|----------------|--------------------------------------------------------------|------------------------------------------------------------------------------------------------------------------------------------------------|-----------------------------------------------------------------|-------------------------------------------------------------------------------------------------------------------------------------------|--------------------------------------------|-------------------------------------------------------------------|
| <b>Level 5</b> | Cheese that is full of pieces of fruit or nuts               | Tray platter with map packaging like catering for sharing<br> | Made with fresh milk, for the best tradition can offer          | Made with an uncompromising attitude to design and creation from years of expert knowledge                                                | Available online from a Chinese seller     | Something I would have for a special celebration                  |
| <b>Level 6</b> | A low lactose cheese that is delicious and easy on the tummy | Cl<br>DarFresh vacuum pack<br>                                | Made with milk from a single cow free to roam on green pastures | Limited small batches, prepared at the dairy, when all the ingredients are in peak season, quickly processed for a unique special flavour | Available online from an Australian seller | Something I would have/give to my partner to show how much I care |

**Table S3 cont.:** Conjoint design for product concepts of **chocolate** (36 levels).

| Category         | Attribute 1 - Product uniqueness           | Attribute 2 - Packaging uniqueness                                                  | Attribute 3 - Ingredient uniqueness                                                                    | Attribute 4 - Provenance process                                       | Attribute 5 - Channel                                     | Attribute 6 - Occasion                                                   |
|------------------|--------------------------------------------|-------------------------------------------------------------------------------------|--------------------------------------------------------------------------------------------------------|------------------------------------------------------------------------|-----------------------------------------------------------|--------------------------------------------------------------------------|
| <b>CHOCOLATE</b> | Premium quality                            | Silver wrap                                                                         | Cocoa from around the world is combined with Australian milk & sugar                                   | Prepared in a modern clean facility                                    | Available at all stores where food and beverages are sold | Something I would have by myself at home                                 |
| <b>Level 1</b>   |                                            |    |                                                                                                        |                                                                        |                                                           |                                                                          |
| <b>Level 2</b>   | Certified organic                          | Green wrap                                                                          | Cocoa from around the world is combined with Chinese milk & sugar                                      | Authenticated, traceable back to farms where the ingredients came from | Available at my local store                               | Something I would share with friends and family                          |
|                  |                                            |    |                                                                                                        |                                                                        |                                                           |                                                                          |
| <b>Level 3</b>   | Full bodied dark chocolate                 | Pouch                                                                               | Made from wild bush grown cocoa beans that provide the maximum health benefits from antioxidants       | Hand crafted by a chocolatier, with a unique recipe                    | Available in the supermarket                              | Something I would share when I am out with friends and family            |
|                  |                                            |   |                                                                                                        |                                                                        |                                                           |                                                                          |
| <b>Level 4</b>   | Smooth plain slightly sweet milk chocolate | Blister pack                                                                        | Globally sourced cocoa blended with just a touch of sugar for a bitter chocolate, full of antioxidants | Handcrafted using traditional methods                                  | Available at a small market / specialty store             | Something I would have for a special occasion like a festival or holiday |
|                  |                                            |  |                                                                                                        |                                                                        |                                                           |                                                                          |

|                |                                                |                                                                                                      |                                                                                        |                                                                                                                                                                             |                                            |                                                                   |
|----------------|------------------------------------------------|------------------------------------------------------------------------------------------------------|----------------------------------------------------------------------------------------|-----------------------------------------------------------------------------------------------------------------------------------------------------------------------------|--------------------------------------------|-------------------------------------------------------------------|
| <b>Level 5</b> | Full of chewy, crunchy nuts with the chocolate | Individual wrap<br> | Single origin globally sourced cocoa beans                                             | Made with an uncompromising attitude to design and creation from years of expert knowledge                                                                                  | Available online from a Chinese seller     | Something I would have for a special celebration                  |
| <b>Level 6</b> | Filled with a soft smooth filling              | Gift pack<br>       | Australian cocoa beans blended with all Australian ingredients for a premium chocolate | Limited rare edition, cocoa beans are picked and roasted in 24 hours from the moment of peak timing once a year, resulting in unique flavours from a special mixing process | Available online from an Australian seller | Something I would have/give to my partner to show how much I care |

**Table S4:** Questions included for segments stratification (responses between 1-2 = laggard, 3-4 = mainstream and 5-7 = lead user). Respondents had to respond to all questions with a number.

|                                                                                                                                                                                                                                                                                                                                                                                                                                                                                        |
|----------------------------------------------------------------------------------------------------------------------------------------------------------------------------------------------------------------------------------------------------------------------------------------------------------------------------------------------------------------------------------------------------------------------------------------------------------------------------------------|
| <p><b>Q1</b> - You consider yourself to be 'ahead of the curve' when it comes to newest ideas, brands, products for premium food products? - In this next section, we would like to ask you some questions about your purchasing and consumption behaviour of premium food products. There are no right or wrong answers, we are interested in your opinions. Please indicate the degree to which each statement is true or characteristic of you: (1=Not at all, 7=Extremely).</p>    |
| <p><b>Q2</b> - You are usually the first within your circle of friends to buy, try new products, brands for premium food products? - In this next section, we would like to ask you some questions about your purchasing and consumption behaviour of premium food products. There are no right or wrong answers, we are interested in your opinions. Please indicate the degree to which each statement is true or characteristic of you: (1=Not at all, 7=Extremely).</p>            |
| <p><b>Q3</b> - You try the newest brands because it insures you are getting the latest and most up-to-date options for premium food products? - In this next section, we would like to ask you some questions about your purchasing and consumption behaviour of premium food products. There are no right or wrong answers, we are interested in your opinions. Please indicate the degree to which each statement is true or characteristic of you: (1=Not at all, 7=Extremely).</p> |
| <p><b>Q4</b> - You feel 'left out' if you're not quick to own newest items/services for premium food products? - In this next section, we would like to ask you some questions about your purchasing and consumption behaviour of premium food products. There are no right or wrong answers, we are interested in your opinions. Please indicate the degree to which each statement is true or characteristic of you: (1=Not at all, 7=Extremely).</p>                                |
| <p>Answer options for each question:</p>                                                                                                                                                                                                                                                                                                                                                                                                                                               |
| 1                                                                                                                                                                                                                                                                                                                                                                                                                                                                                      |
| 2                                                                                                                                                                                                                                                                                                                                                                                                                                                                                      |
| 3                                                                                                                                                                                                                                                                                                                                                                                                                                                                                      |
| 4                                                                                                                                                                                                                                                                                                                                                                                                                                                                                      |
| 5                                                                                                                                                                                                                                                                                                                                                                                                                                                                                      |
| 6                                                                                                                                                                                                                                                                                                                                                                                                                                                                                      |
| 7                                                                                                                                                                                                                                                                                                                                                                                                                                                                                      |

**Figure S1:** Example per category of how the respondent saw the concepts in the survey.

Which concept best fits your idea of the most premium/high end **BEEF**?

Please select one only

| Option 1                                                                              | Option 2                                                                                                                                                                       | Option 3                                                                                                                                   | Option 4                                                                            |
|---------------------------------------------------------------------------------------|--------------------------------------------------------------------------------------------------------------------------------------------------------------------------------|--------------------------------------------------------------------------------------------------------------------------------------------|-------------------------------------------------------------------------------------|
| Slow cooked beef with onion and gravy, just heat and eat                              | Cuts like heart, liver, kidney... full of nutrition                                                                                                                            | Classic Beef Roast cut and tied, ready to cook                                                                                             | Beef sirloin, tender and juicy every time                                           |
|      |                                                                                               |                                                          |  |
| Traditional Australian Breeds like Brahaman or Angus                                  | Unique breeds like older Longhorns that have a chance to develop more flavour, with a delicate beefy flavour and a slightly acid finish without having a very high fat content | Lean heart healthy beef, raised to have monosaturated fats to lower your blood pressure and cholesterol, but still have lots of flavour    | Premium pasture fed beef from Blackmore's Wagyu, Cape Grim, or Minderoo             |
| Highest quality premium meat, recommended by celebrities, and chefs as their favorite | Raised on a small family farm, grass feed using biodiverse pastures, hormone free, using sustainable farming practices                                                         | Aged using Traditional craftsmanship practices like dry aging for 35 days to tenderize and create a distinctive melt in your mouth flavour | Authenticated, traceable back to the farm                                           |
| Available in the supermarket                                                          | Available at a small market / specialty store                                                                                                                                  | Available online from a Chinese seller                                                                                                     | Available online from an Australian seller                                          |
| Something I would have/give to my partner to show how much I care                     | Something I would have for a special celebration                                                                                                                               | Something I would have for a special occasion like a festival or holiday                                                                   | Something I would share when I am out with friends and family                       |
| <input type="radio"/>                                                                 | <input type="radio"/>                                                                                                                                                          | <input type="radio"/>                                                                                                                      | <input type="radio"/>                                                               |

**Figure S1 cont.:** Example per category of how the respondent saw the concepts in the survey.

Which concept best fits your idea of the most premium/high end **PORK**?

Please select one only

| Option 1                                                                          | Option 2                                                                          | Option 3                                                                           | Option 4                                                                            |
|-----------------------------------------------------------------------------------|-----------------------------------------------------------------------------------|------------------------------------------------------------------------------------|-------------------------------------------------------------------------------------|
| Fresh Australian pork loin chop                                                   | Tender and juicy Australian pork loin chop                                        | Authentic Australian pork loin chop                                                | Authentic, tender and juicy Australian pork loin chop                               |
|  |  |  |  |
| Healthy, natural Australian pork                                                  | Certified free range Australian pork                                              | Locally sourced, tasty Australian pork                                             | Traditional Australian pork farmed using sustainable practices                      |
| Australian pork packaged and prepared in China                                    | Australian pork packaged and prepared in Australia                                | Fresh quality pork, 100% Australian farmed and butchered                           | Traditional European Berkshire breed. Farmed in Australia                           |
| Available at all stores where food and beverages are sold                         | Available at my local store                                                       | Available online with little information on country of origin                      | Available at my Supermarket                                                         |
| Something I would have by myself at home                                          | Something I would share with friends and family                                   | Something I would share when I am out with friends and family                      | Something I would have for a special celebration                                    |
| <input type="radio"/>                                                             | <input type="radio"/>                                                             | <input type="radio"/>                                                              | <input type="radio"/>                                                               |

**Figure S1 cont.:** Example per category of how the respondent saw the concepts in the survey.

Which concept best fits your idea of the most premium/high end **CHEESE**?

Please select one only

| Option 1                                                                          | Option 2                                                                          | Option 3                                                                           | Option 4                                                                            |
|-----------------------------------------------------------------------------------|-----------------------------------------------------------------------------------|------------------------------------------------------------------------------------|-------------------------------------------------------------------------------------|
| Premium quality                                                                   | Certified organic                                                                 | Flavorful cheese                                                                   | Lightly flavored cheese                                                             |
|  |  |  |  |
| Made with fresh Australian A2 high protein milk                                   | Made with Australian bush ingredients to enhance health and wellbeing             | Made with fresh Chinese milk                                                       | Made with fresh Australian milk                                                     |
| Prepared in a modern clean facility                                               | Authenticated, traceable back to the dairy farm                                   | Hand crafted by a chef with a unique recipe                                        | Handcrafted using traditional methods                                               |
| Available at a small market / specialty store                                     | Available online from a Chinese seller                                            | Available in the supermarket                                                       | Available at my local store                                                         |
| Something I would have for a special celebration                                  | Something I would have/give to my partner to show how much I care                 | Something I would have by myself at home                                           | Something I would share with friends and family                                     |
| <input type="radio"/>                                                             | <input type="radio"/>                                                             | <input type="radio"/>                                                              | <input type="radio"/>                                                               |

**Figure S1 cont.:** Example per category of how the respondent saw the concepts in the survey.

Which concept best fits your idea of the most premium/high end **CHOCOLATE**?

Please select one only

| Option 1                                                                          | Option 2                                                                          | Option 3                                                                          | Option 4                                                                                         |
|-----------------------------------------------------------------------------------|-----------------------------------------------------------------------------------|-----------------------------------------------------------------------------------|--------------------------------------------------------------------------------------------------|
| Smooth plain slightly sweet milk chocolate                                        | Full bodied dark chocolate                                                        | Premium quality                                                                   | Certified organic                                                                                |
|  |  |  |               |
| Cocoa from around the world is combined with Australian milk & sugar              | Cocoa from around the world is combined with Chinese milk & sugar                 | Single origin globally sourced cocoa beans                                        | Made from wild bush grown cocoa beans that provide the maximum health benefits from antioxidants |
| Handcrafted using traditional methods                                             | Hand crafted by a chocolatier, with a unique recipe                               | Authenticated, traceable back to farms where the ingredients came from            | Prepared in a modern clean facility                                                              |
| Available at all stores where food and beverages are sold                         | Available online from a Chinese seller                                            | Available online from an Australian seller                                        | Available at my local store                                                                      |
| Something I would have for a special occasion like a festival or holiday          | Something I would have/give to my partner to show how much I care                 | Something I would share when I am out with friends and family                     | Something I would have by myself at home                                                         |
| <input type="radio"/>                                                             | <input type="radio"/>                                                             | <input type="radio"/>                                                             | <input type="radio"/>                                                                            |



**Table 5.** Utility weight (regression coefficient) for beef, pork, cheese and chocolate concepts per attributes according to age, gender and country of origin (Australia or China),

|            | Country                                                                                                                                                                        | Australia |       |       |        |       |       | China |       |       |        |       |       |
|------------|--------------------------------------------------------------------------------------------------------------------------------------------------------------------------------|-----------|-------|-------|--------|-------|-------|-------|-------|-------|--------|-------|-------|
|            |                                                                                                                                                                                | Male      |       |       | Female |       |       | Male  |       |       | Female |       |       |
|            | Age group                                                                                                                                                                      | 25-44     | 45-54 | ≥55   | 25-44  | 45-54 | ≥55   | 25-44 | 45-54 | ≥55   | 25-44  | 45-54 | ≥55   |
|            | Number of respondents                                                                                                                                                          | 48        | 40    | 89    | 92     | 58    | 71    | 131   | 41    | 15    | 151    | 44    | 17    |
| Attributes | Levels                                                                                                                                                                         |           |       |       |        |       |       |       |       |       |        |       |       |
| Product    | Beef mince with just the right amount of fat                                                                                                                                   | -0.81     | -0.42 | -0.25 | -0.43  | -0.54 | -0.63 | -0.77 | -0.64 | -0.51 | -0.65  | -0.37 | -0.63 |
|            | Beef stir fry, cut in just the right size                                                                                                                                      | 0.04      | 0.18  | -0.20 | -0.11  | 0.16  | 0.07  | 0.40  | 0.12  | 1.17  | 0.11   | 0.28  | 0.64  |
|            | Slow cooked beef with onion and gravy, just heat and eat                                                                                                                       | -1.11     | -0.78 | -0.37 | -0.72  | -0.92 | -0.54 | -0.15 | -0.16 | -0.02 | 0.00   | -0.33 | -0.37 |
|            | Cuts like heart, liver, kidney... full of nutrition                                                                                                                            | -2.49     | -2.99 | -2.69 | -2.62  | -2.65 | -2.69 | -0.55 | 0.02  | -0.38 | -0.11  | -0.33 | -0.23 |
|            | Classic Beef Roast cut and tied, ready to cook                                                                                                                                 | 1.60      | 1.42  | 1.36  | 1.61   | 1.42  | 1.35  | 0.24  | 0.03  | -0.64 | -0.01  | 0.13  | -0.10 |
| Package    | Beef sirloin, tender and juicy every time                                                                                                                                      | 2.78      | 2.59  | 2.15  | 2.27   | 2.53  | 2.44  | 0.83  | 0.62  | 0.38  | 0.67   | 0.62  | 0.69  |
|            | Map tray sealed on top clear with loin cut                                                                                                                                     | -0.22     | -0.29 | -0.20 | -0.07  | -0.16 | -0.08 | -0.77 | -0.64 | -0.51 | -0.65  | -0.37 | -0.63 |
|            | Map tray sealed on top black with loin cut                                                                                                                                     | -0.08     | 0.09  | -0.01 | 0.06   | -0.18 | 0.11  | 0.40  | 0.12  | 1.17  | 0.11   | 0.28  | 0.64  |
|            | Map tray seal with shiny black tray                                                                                                                                            | -0.39     | -0.50 | -0.43 | -0.50  | -0.47 | -0.44 | -0.15 | -0.16 | -0.02 | 0.00   | -0.33 | -0.37 |
|            | Darfresh Vacuum sealed, green tray                                                                                                                                             | 0.04      | 0.16  | 0.10  | 0.01   | 0.09  | -0.07 | -0.55 | 0.02  | -0.38 | -0.11  | -0.33 | -0.23 |
| Ingredient | Matt black flat tray with tiny lip Darfresh vacuum, meat higher than lip with gold base                                                                                        | 0.28      | 0.56  | 0.57  | 0.63   | 0.52  | 0.53  | 0.24  | 0.03  | -0.64 | -0.01  | 0.13  | -0.10 |
|            | Butcher board square wood with meat on top                                                                                                                                     | 0.36      | -0.03 | -0.02 | -0.13  | 0.21  | -0.05 | 0.83  | 0.62  | 0.38  | 0.67   | 0.62  | 0.69  |
|            | Fresh Australian beef                                                                                                                                                          | -0.39     | 0.18  | 0.30  | -0.09  | 0.14  | 0.50  | -0.27 | -0.14 | -0.23 | -0.34  | -0.17 | -0.29 |
|            | Certified organic Australian beef                                                                                                                                              | 0.28      | 0.07  | -0.09 | 0.35   | 0.15  | 0.28  | 0.30  | 0.17  | 0.48  | 0.28   | 0.28  | 0.71  |
|            | Traditional Australian Breeds like Brahman or Angus                                                                                                                            | 0.20      | 0.20  | 0.61  | 0.21   | 0.46  | 0.65  | -0.29 | -0.37 | -0.67 | -0.51  | -0.59 | -0.38 |
|            | Unique breeds like older Longhorns that have a chance to develop more flavour, with a delicate beefy flavour and a slightly acid finish without having a very high fat content | -0.33     | -0.52 | -0.63 | -0.74  | -0.85 | -1.11 | 0.15  | -0.04 | -0.03 | 0.13   | -0.03 | -0.09 |

|            | Country                                                                                                                                    | Australia |       |       |        |       |       | China |       |       |        |       |       |
|------------|--------------------------------------------------------------------------------------------------------------------------------------------|-----------|-------|-------|--------|-------|-------|-------|-------|-------|--------|-------|-------|
|            | Gender                                                                                                                                     | Male      |       |       | Female |       |       | Male  |       |       | Female |       |       |
|            | Age group                                                                                                                                  | 25-44     | 45-54 | ≥55   | 25-44  | 45-54 | ≥55   | 25-44 | 45-54 | ≥55   | 25-44  | 45-54 | ≥55   |
|            | Number of respondents                                                                                                                      | 48        | 40    | 89    | 92     | 58    | 71    | 131   | 41    | 15    | 151    | 44    | 17    |
| Attributes | Levels                                                                                                                                     |           |       |       |        |       |       |       |       |       |        |       |       |
|            | Lean heart healthy beef, raised to have monosaturated fats to lower your blood pressure and cholesterol, but still have lots of flavour    | -0.59     | -0.46 | -0.50 | -0.28  | -0.66 | -0.55 | 0.34  | 0.57  | 0.71  | 0.58   | 0.71  | 0.72  |
|            | Premium pasture fed beef from Blackmore's Wagyu, Cape Grim, or Minderoo                                                                    | 0.84      | 0.52  | 0.31  | 0.54   | 0.77  | 0.23  | -0.23 | -0.18 | -0.26 | -0.15  | -0.20 | -0.67 |
| Provenance | Australian meat packaged and prepared in China                                                                                             | -4.03     | -4.58 | -4.80 | -4.70  | -4.80 | -5.39 | -0.27 | -0.12 | 0.03  | -0.35  | -0.16 | -0.25 |
|            | Australian meat packaged and prepared in Australia                                                                                         | 0.77      | 1.08  | 1.29  | 1.33   | 1.23  | 1.61  | 0.14  | -0.08 | -0.32 | 0.09   | 0.07  | 0.53  |
|            | Authenticated, traceable back to the farm                                                                                                  | 0.74      | 0.96  | 1.10  | 0.64   | 1.00  | 0.98  | -0.01 | 0.41  | -0.03 | 0.15   | 0.17  | 0.14  |
|            | Aged using Traditional craftsmanship practices like dry aging for 35 days to tenderize and create a distinctive melt in your mouth flavour | 0.99      | 1.02  | 0.87  | 0.95   | 0.97  | 0.83  | 0.16  | 0.10  | 0.11  | 0.04   | -0.01 | -0.08 |
|            | Raised on a small family farm, grass feed using biodiverse pastures, hormone free, using sustainable farming practices                     | 1.50      | 1.36  | 1.58  | 1.61   | 1.74  | 1.99  | 0.33  | 0.20  | 0.11  | 0.39   | 0.44  | 0.10  |
|            | Highest quality premium meat, recommended by celebrities, and chefs as their favorite                                                      | 0.03      | 0.16  | -0.03 | 0.17   | -0.14 | -0.02 | -0.33 | -0.51 | 0.10  | -0.31  | -0.51 | -0.45 |
| Channel    | Available at all stores where food and beverages are sold                                                                                  | 0.69      | 1.16  | 1.32  | 0.89   | 1.09  | 1.56  | 0.12  | 0.34  | -0.27 | 0.20   | 0.10  | 0.53  |
|            | Available at my local store                                                                                                                | 1.45      | 1.43  | 1.75  | 1.69   | 1.50  | 1.86  | 0.10  | 0.03  | 0.96  | -0.01  | 0.00  | -0.14 |
|            | Available in the supermarket                                                                                                               | 1.34      | 1.33  | 1.57  | 1.37   | 1.62  | 1.83  | 0.59  | 0.40  | 1.01  | 0.67   | 0.71  | 0.34  |
|            | Available at a small market / specialty store                                                                                              | 0.83      | 0.82  | 1.07  | 0.96   | 0.90  | 1.06  | -0.71 | -0.86 | -0.93 | -0.66  | -0.65 | -0.66 |
|            | Available online from a Chinese seller                                                                                                     | -3.65     | -4.07 | -4.80 | -4.42  | -4.49 | -5.28 | -0.30 | -0.38 | -0.32 | -0.49  | -0.27 | -0.28 |
|            | Available online from an Australian seller                                                                                                 | -0.65     | -0.67 | -0.92 | -0.49  | -0.62 | -1.03 | 0.22  | 0.47  | -0.44 | 0.29   | 0.11  | 0.21  |
| Occasion   | Something I would have by myself at home                                                                                                   | -0.41     | 0.06  | 0.00  | -0.15  | -0.25 | -0.15 | -0.08 | -0.15 | -0.30 | -0.02  | -0.08 | 0.01  |
|            | Something I would share with friends and family                                                                                            | 0.73      | 0.61  | 0.61  | 0.58   | 0.77  | 1.01  | 0.42  | 0.25  | 0.13  | 0.27   | 0.31  | 0.19  |

|            | Country                                                                  | Australia |       |       |        |       |       | China |       |       |        |       |       |
|------------|--------------------------------------------------------------------------|-----------|-------|-------|--------|-------|-------|-------|-------|-------|--------|-------|-------|
|            | Gender                                                                   | Male      |       |       | Female |       |       | Male  |       |       | Female |       |       |
|            | Age group                                                                | 25-44     | 45-54 | ≥55   | 25-44  | 45-54 | ≥55   | 25-44 | 45-54 | ≥55   | 25-44  | 45-54 | ≥55   |
|            | Number of respondents                                                    | 48        | 40    | 89    | 92     | 58    | 71    | 131   | 41    | 15    | 151    | 44    | 17    |
| Attributes | Levels                                                                   |           |       |       |        |       |       |       |       |       |        |       |       |
|            | Something I would share when I am out with friends and family            | 0.11      | 0.17  | 0.01  | 0.17   | 0.06  | 0.22  | -0.05 | 0.17  | 0.20  | -0.06  | 0.21  | 0.14  |
|            | Something I would have for a special occasion like a festival or holiday | 0.16      | -0.05 | 0.03  | -0.06  | 0.15  | -0.32 | -0.11 | 0.11  | 0.48  | 0.00   | -0.28 | -0.07 |
|            | Something I would have for a special celebration                         | -0.36     | -0.53 | -0.43 | -0.29  | -0.29 | -0.49 | -0.22 | -0.25 | 0.07  | -0.21  | -0.25 | -0.07 |
|            | Something I would have/give to my partner to show how much I care        | -0.22     | -0.26 | -0.22 | -0.26  | -0.45 | -0.26 | 0.05  | -0.14 | -0.56 | 0.01   | 0.10  | -0.20 |

**Table S5 cont.:** Utility weight (regression coefficient) for **pork** concepts per attributes according to age, gender and country of origin (Australia or China).

|            | Country                                                                                 | Australia |       |       |        |       |       | China |       |       |        |       |       |
|------------|-----------------------------------------------------------------------------------------|-----------|-------|-------|--------|-------|-------|-------|-------|-------|--------|-------|-------|
|            | Gender                                                                                  | Male      |       |       | Female |       |       | Male  |       |       | Female |       |       |
|            | Age group                                                                               | 25-44     | 45-54 | ≥55   | 25-44  | 45-54 | ≥55   | 25-44 | 45-54 | ≥55   | 25-44  | 45-54 | ≥55   |
|            | Number of respondents                                                                   | 55        | 41    | 86    | 83     | 66    | 56    | 157   | 39    | 25    | 122    | 50    | 11    |
| Attributes | Levels                                                                                  |           |       |       |        |       |       |       |       |       |        |       |       |
| Product    | Pork loin chop                                                                          | -0.46     | -0.64 | -0.70 | -0.58  | -0.53 | -0.47 | -0.46 | -0.18 | -0.69 | -0.38  | -0.63 | -0.19 |
|            | Australian pork loin chop                                                               | -0.08     | 0.24  | 0.32  | 0.09   | 0.02  | 0.04  | -0.25 | 0.04  | -0.05 | -0.27  | -0.58 | 0.20  |
|            | Fresh Australian pork loin chop                                                         | 0.10      | 0.23  | 0.43  | 0.35   | 0.07  | 0.29  | -0.63 | -0.63 | -0.65 | -0.57  | -0.79 | -0.67 |
|            | Tender and juicy Australian pork loin chop                                              | -0.19     | -0.03 | -0.04 | -0.17  | -0.12 | 0.03  | -0.23 | -0.19 | -0.08 | -0.28  | -0.15 | -0.50 |
|            | Authentic Australian pork loin chop                                                     | 0.17      | 0.10  | -0.01 | 0.18   | 0.38  | 0.05  | 0.31  | 0.18  | 0.36  | 0.34   | 0.64  | 0.06  |
|            | Authentic, tender and juicy Australian pork loin chop                                   | 0.47      | 0.10  | 0.01  | 0.13   | 0.17  | 0.07  | 1.25  | 0.79  | 1.10  | 1.16   | 1.50  | 1.10  |
| Package    | Map tray sealed on top clear with loin cut                                              | -0.17     | -0.34 | -0.04 | -0.42  | -0.21 | -0.09 | -0.06 | -0.04 | -0.40 | -0.09  | -0.07 | 0.13  |
|            | Map tray sealed on top black with loin cut                                              | -0.16     | -0.41 | -0.40 | -0.32  | -0.02 | -0.11 | 0.04  | -0.11 | 0.74  | -0.07  | -0.29 | -0.03 |
|            | Map tray seal with shiny black tray                                                     | 0.45      | 0.51  | 0.25  | 0.51   | 0.59  | 0.39  | -0.29 | 0.00  | -0.08 | -0.18  | -0.10 | -0.25 |
|            | Darfresh Vacuum sealed, green tray                                                      | 0.70      | 0.57  | 0.37  | 0.63   | 0.51  | 0.15  | 0.21  | 0.04  | 0.26  | 0.19   | 0.07  | -0.07 |
|            | Matt black flat tray with tiny lip Darfresh vacuum, meat higher than lip with gold base | -0.25     | -0.25 | -0.21 | -0.39  | -0.43 | -0.40 | 0.51  | 0.40  | 0.20  | 0.42   | 0.49  | 0.15  |
|            | Butcher board square wood with meat on top                                              | -0.56     | -0.08 | 0.03  | -0.01  | -0.44 | 0.07  | -0.41 | -0.29 | -0.72 | -0.27  | -0.10 | 0.06  |
| Ingredient | Australian pork                                                                         | -1.42     | -1.39 | -1.49 | -1.13  | -1.53 | -1.43 | -0.58 | -0.69 | -0.14 | -0.65  | -0.23 | -0.82 |
|            | Fresh Australian pork, lean and heart smart                                             | 0.07      | 0.13  | 0.48  | 0.01   | 0.41  | 0.35  | 0.33  | 0.29  | 0.22  | 0.32   | 0.31  | 0.63  |
|            | Healthy, natural Australian pork                                                        | -0.75     | -0.42 | -0.27 | -0.68  | -0.57 | -0.33 | 0.20  | 0.29  | 0.38  | 0.25   | 0.23  | 0.19  |
|            | Certified free range Australian pork                                                    | 1.05      | 0.94  | 0.79  | 0.98   | 1.25  | 1.14  | 0.53  | 0.37  | 0.49  | 0.48   | 0.33  | 0.47  |
|            | Locally sourced, tasty Australian pork                                                  | 0.32      | 0.30  | 0.27  | 0.43   | 0.19  | 0.03  | -0.46 | -0.43 | -0.51 | -0.43  | -0.50 | -0.25 |
|            | Traditional Australian pork farmed using sustainable practices                          | 0.73      | 0.45  | 0.21  | 0.38   | 0.25  | 0.25  | -0.01 | 0.16  | -0.45 | 0.03   | -0.14 | -0.21 |
| Provenance | Australian meat packaged and prepared in China                                          | -5.39     | -5.24 | -5.46 | -5.56  | -5.63 | -5.89 | 0.05  | -0.17 | -0.18 | -0.21  | 0.45  | 0.19  |
|            | Australian meat packaged and prepared in Australia                                      | 1.05      | 1.19  | 1.02  | 0.87   | 0.82  | 1.37  | 0.15  | -0.01 | 0.39  | 0.08   | -0.02 | -0.18 |
|            | Authenticated, traceable back to the farm                                               | 1.20      | 1.14  | 1.37  | 1.36   | 1.43  | 1.67  | -0.28 | 0.18  | -0.71 | -0.05  | -0.28 | 0.15  |

|            | Country                                                                                                                                    | Australia |       |       |        |       |       | China |       |       |        |       |       |
|------------|--------------------------------------------------------------------------------------------------------------------------------------------|-----------|-------|-------|--------|-------|-------|-------|-------|-------|--------|-------|-------|
|            | Gender                                                                                                                                     | Male      |       |       | Female |       |       | Male  |       |       | Female |       |       |
|            | Age group                                                                                                                                  | 25-44     | 45-54 | ≥55   | 25-44  | 45-54 | ≥55   | 25-44 | 45-54 | ≥55   | 25-44  | 45-54 | ≥55   |
|            | Number of respondents                                                                                                                      | 55        | 41    | 86    | 83     | 66    | 56    | 157   | 39    | 25    | 122    | 50    | 11    |
| Attributes | Levels                                                                                                                                     |           |       |       |        |       |       |       |       |       |        |       |       |
|            | Aged using Traditional craftsmanship practices like dry aging for 35 days to tenderize and create a distinctive melt in your mouth flavour | -0.25     | -0.03 | -0.23 | -0.24  | 0.11  | -0.40 | -0.13 | -0.22 | 0.02  | -0.12  | -0.28 | -0.39 |
|            | Raised on a small family farm, grass feed using biodiverse pastures, hormone free, using sustainable farming practices                     | 2.05      | 2.01  | 2.20  | 2.39   | 2.07  | 2.24  | 0.12  | 0.15  | 0.32  | 0.15   | -0.01 | -0.11 |
|            | Highest quality premium meat, recommended by celebrities, and chefs as their favorite                                                      | 1.35      | 0.93  | 1.10  | 1.18   | 1.20  | 1.01  | 0.09  | 0.08  | 0.16  | 0.14   | 0.15  | 0.34  |
| Channel    | Available at all stores where food and beverages are sold                                                                                  | 0.79      | 0.67  | 0.96  | 0.72   | 0.80  | 1.10  | -0.26 | -0.43 | -0.53 | -0.33  | -0.15 | -0.27 |
|            | Available at my local store                                                                                                                | 0.69      | 0.82  | 0.88  | 1.08   | 0.90  | 1.29  | -0.01 | 0.24  | 0.10  | 0.17   | 0.27  | 0.28  |
|            | Available in the supermarket                                                                                                               | -2.66     | -2.69 | -3.35 | -3.21  | -3.06 | -3.53 | -0.60 | -0.82 | -0.69 | -0.73  | -0.59 | -0.82 |
|            | Available at a small market / specialty store                                                                                              | 0.77      | 1.02  | 1.21  | 0.75   | 0.64  | 1.31  | -0.16 | -0.51 | 0.21  | -0.51  | -0.51 | -0.83 |
|            | Available online from a Chinese seller                                                                                                     | 0.11      | 0.04  | -0.12 | 0.15   | 0.22  | -0.39 | 0.78  | 1.05  | 0.84  | 0.91   | 0.76  | 1.05  |
|            | Available online from an Australian seller                                                                                                 | 0.30      | 0.14  | 0.42  | 0.51   | 0.51  | 0.22  | 0.26  | 0.47  | 0.07  | 0.51   | 0.23  | 0.59  |
| Occasion   | Something I would have by myself at home                                                                                                   | 0.02      | -0.13 | 0.13  | -0.06  | -0.02 | 0.08  | -0.13 | 0.15  | -0.67 | 0.21   | 0.11  | -0.01 |
|            | Something I would share with friends and family                                                                                            | 0.21      | 0.29  | 0.20  | 0.18   | 0.05  | 0.06  | 0.55  | 0.46  | 0.75  | 0.35   | 0.41  | 0.32  |
|            | Something I would share when I am out with friends and family                                                                              | -0.07     | -0.06 | -0.10 | -0.14  | -0.16 | -0.14 | 0.07  | -0.06 | 0.33  | -0.08  | -0.15 | -0.14 |
|            | Something I would have for a special occasion like a festival or holiday                                                                   | 0.14      | 0.02  | 0.00  | 0.10   | 0.20  | 0.04  | -0.05 | 0.14  | 0.01  | 0.20   | -0.31 | 0.07  |
|            | Something I would have for a special celebration                                                                                           | 0.19      | 0.24  | -0.08 | 0.23   | 0.28  | 0.04  | -0.19 | -0.21 | -0.43 | -0.22  | -0.15 | 0.07  |
|            | Something I would have/give to my partner to show how much I care                                                                          | -0.49     | -0.36 | -0.14 | -0.31  | -0.34 | -0.07 | -0.24 | -0.49 | 0.00  | -0.48  | 0.09  | -0.32 |

**Table S5 cont.:** Utility weight (regression coefficient) for cheese concepts per attributes according to age, gender and country of origin (Australia or China).

|            |                                                                       | Country   |       |       |           |       |       | China     |       |       |           |       |       |
|------------|-----------------------------------------------------------------------|-----------|-------|-------|-----------|-------|-------|-----------|-------|-------|-----------|-------|-------|
|            |                                                                       | Australia |       |       | Female    |       |       | Male      |       |       | Female    |       |       |
|            |                                                                       | Age group |       |       | Age group |       |       | Age group |       |       | Age group |       |       |
|            |                                                                       | 25-44     | 45-54 | ≥55   | 25-44     | 45-54 | ≥55   | 25-44     | 45-54 | ≥55   | 25-44     | 45-54 | ≥55   |
|            |                                                                       | 46        | 46    | 62    | 92        | 65    | 72    | 146       | 32    | 14    | 164       | 28    | 17    |
| Attributes | Levels                                                                |           |       |       |           |       |       |           |       |       |           |       |       |
| Product    | Premium quality                                                       | 1.01      | 1.51  | 1.19  | 0.82      | 1.02  | 0.45  | 0.51      | 0.49  | 0.09  | 0.48      | 0.65  | 0.64  |
|            | Certified organic                                                     | 0.16      | -0.06 | -0.15 | 0.13      | 0.28  | 0.35  | 0.41      | 0.23  | -0.06 | 0.42      | 0.54  | 0.35  |
|            | Flavorful cheese                                                      | 0.74      | 1.10  | 1.27  | 1.03      | 1.00  | 1.16  | -0.24     | 0.01  | -0.21 | -0.33     | -0.24 | -0.25 |
|            | Lightly flavored cheese                                               | -0.81     | -0.86 | -0.41 | -0.71     | -0.49 | -0.31 | -0.41     | -0.31 | -0.13 | -0.32     | -0.44 | -0.65 |
|            | Cheese that is full of pieces of fruit or nuts                        | -0.81     | -0.79 | -0.90 | -0.60     | -0.74 | -0.75 | -0.15     | -0.23 | 0.33  | -0.19     | -0.42 | 0.04  |
|            | A low lactose cheese that is delicious and easy on the tummy          | -0.30     | -0.90 | -1.01 | -0.68     | -1.07 | -0.90 | -0.12     | -0.19 | -0.02 | -0.07     | -0.09 | -0.11 |
| Package    | Slice cheese plastic individual wrap                                  | -0.39     | -0.94 | -0.85 | -0.91     | -0.83 | -0.74 | 0.06      | 0.18  | 0.10  | 0.05      | -0.11 | -0.22 |
|            | Cheese sticks                                                         | -0.96     | -0.98 | -1.14 | -0.94     | -0.98 | -0.98 | -0.29     | -0.37 | -0.10 | -0.21     | -0.17 | -0.02 |
|            | Laughing cow triangle foil wrap in wheel                              | -0.31     | -0.42 | -0.38 | -0.53     | -0.23 | -0.49 | 0.21      | 0.12  | -0.11 | 0.10      | 0.14  | -0.12 |
|            | Baby bell wax peel                                                    | 0.23      | 0.48  | 0.54  | 0.47      | 0.33  | 0.61  | 0.36      | 0.32  | 0.08  | 0.51      | 0.63  | 0.21  |
|            | Tray platter with map packaging like catering for sharing             | 0.76      | 0.89  | 0.95  | 1.01      | 0.89  | 0.90  | -0.12     | 0.02  | 0.13  | -0.10     | -0.09 | 0.09  |
|            | Cheese board with DarFresh vacuum pack                                | 0.67      | 0.97  | 0.89  | 0.91      | 0.82  | 0.70  | -0.21     | -0.26 | -0.09 | -0.35     | -0.40 | 0.07  |
| Ingredient | Made with fresh Australian milk                                       | 1.31      | 1.54  | 2.12  | 1.57      | 1.99  | 2.15  | -0.11     | -0.55 | -0.61 | -0.18     | 0.11  | -0.51 |
|            | Made with fresh Chinese milk                                          | -4.26     | -4.79 | -5.16 | -4.82     | -5.45 | -6.21 | -1.19     | -0.78 | -0.90 | -1.11     | -0.80 | -1.22 |
|            | Made with Australian bush ingredients to enhance health and wellbeing | 1.19      | 1.04  | 0.74  | 0.99      | 1.14  | 1.14  | 0.78      | 0.72  | 0.56  | 0.78      | 0.39  | 0.60  |
|            | Made with fresh Australian A2 high protein milk                       | 0.66      | 0.52  | 0.74  | 0.81      | 0.79  | 1.01  | 0.38      | -0.07 | -0.12 | 0.48      | 0.39  | 0.29  |
|            | Made with fresh milk, for the best tradition can offer                | 0.23      | 0.62  | 0.42  | 0.37      | 0.56  | 0.43  | -0.38     | -0.21 | -0.16 | -0.37     | -0.58 | -0.01 |
|            | Made with milk from a single cow free to roam on green pastures       | 0.87      | 1.06  | 1.15  | 1.09      | 0.97  | 1.48  | 0.51      | 0.89  | 1.23  | 0.41      | 0.50  | 0.86  |
| Provenance | Prepared in a modern clean facility                                   | -0.58     | -0.69 | -0.71 | -0.93     | -1.02 | -0.86 | -0.38     | -0.12 | -0.44 | -0.40     | -0.45 | -0.19 |
|            | Authenticated, traceable back to the dairy farm                       | 0.20      | 0.64  | 0.53  | 0.51      | 0.27  | 0.43  | 0.62      | 0.23  | 0.79  | 0.75      | 0.72  | 0.37  |

|            | Country                                                                                                                                  | Australia |       |       |        |       |       | China |       |       |        |       |       |
|------------|------------------------------------------------------------------------------------------------------------------------------------------|-----------|-------|-------|--------|-------|-------|-------|-------|-------|--------|-------|-------|
|            | Gender                                                                                                                                   | Male      |       |       | Female |       |       | Male  |       |       | Female |       |       |
|            | Age group                                                                                                                                | 25-44     | 45-54 | ≥55   | 25-44  | 45-54 | ≥55   | 25-44 | 45-54 | ≥55   | 25-44  | 45-54 | ≥55   |
|            | Number of respondents                                                                                                                    | 46        | 46    | 62    | 92     | 65    | 72    | 146   | 32    | 14    | 164    | 28    | 17    |
| Attributes | Levels                                                                                                                                   |           |       |       |        |       |       |       |       |       |        |       |       |
|            | Hand crafted by a chef with a unique recipe                                                                                              | -0.17     | -0.09 | 0.16  | 0.03   | -0.15 | 0.01  | -0.62 | -0.29 | -0.05 | -0.53  | -0.91 | -0.30 |
|            | Handcrafted using traditional methods                                                                                                    | 0.45      | 0.09  | 0.25  | 0.39   | 0.46  | 0.27  | -0.27 | -0.39 | 0.08  | -0.12  | -0.03 | 0.20  |
|            | Made with an uncompromising attitude to design and creation from years of expert knowledge                                               | -0.53     | -0.52 | -0.56 | -0.66  | -0.53 | -0.60 | 0.47  | 0.39  | -0.20 | 0.07   | 0.25  | 0.11  |
|            | Limited small batches, prepared at the dairy, when all the ingredients are in peak season, quickly processed for a unique special flavor | 0.63      | 0.57  | 0.33  | 0.66   | 0.95  | 0.75  | 0.18  | 0.19  | -0.18 | 0.24   | 0.41  | -0.18 |
| Channel    | Available at all stores where food and beverages are sold                                                                                | 1.05      | 1.32  | 1.39  | 1.22   | 1.57  | 1.36  | 0.11  | -0.21 | -0.46 | 0.15   | 0.32  | 0.30  |
|            | Available at my local store                                                                                                              | 0.72      | 0.81  | 0.91  | 0.77   | 0.97  | 0.97  | -0.04 | 0.03  | 0.07  | -0.25  | -0.11 | -0.20 |
|            | Available in the supermarket                                                                                                             | 0.74      | 0.61  | 1.30  | 1.06   | 0.84  | 1.32  | 0.10  | 0.47  | 0.43  | 0.12   | 0.30  | 0.36  |
|            | Available at a small market / specialty store                                                                                            | 0.55      | 1.11  | 0.99  | 1.04   | 1.26  | 1.59  | -0.29 | -0.13 | -0.23 | -0.37  | -0.42 | -0.36 |
|            | Available online from a Chinese seller                                                                                                   | -3.09     | -3.80 | -4.33 | -4.08  | -4.68 | -5.40 | -0.31 | -0.34 | -0.12 | -0.31  | -0.17 | -0.57 |
|            | Available online from an Australian seller                                                                                               | 0.02      | -0.05 | -0.26 | 0.00   | 0.04  | 0.17  | 0.42  | 0.18  | 0.31  | 0.65   | 0.07  | 0.47  |
| Occasion   | Something I would have by myself at home                                                                                                 | -0.21     | -0.56 | -0.49 | -0.40  | -0.75 | -0.62 | -0.13 | 0.01  | -0.12 | -0.20  | -0.43 | -0.47 |
|            | Something I would share with friends and family                                                                                          | 0.09      | 0.40  | 0.40  | 0.20   | 0.40  | 0.53  | -0.31 | -0.41 | -0.56 | -0.14  | -0.10 | -0.70 |
|            | Something I would share when I am out with friends and family                                                                            | -0.08     | 0.05  | 0.01  | 0.02   | 0.09  | 0.30  | 0.54  | 0.70  | 0.64  | 0.52   | 0.51  | 0.51  |
|            | Something I would have for a special occasion like a festival or holiday                                                                 | -0.33     | 0.07  | 0.04  | -0.09  | -0.10 | -0.35 | 0.13  | 0.30  | 0.08  | 0.10   | 0.13  | 0.00  |
|            | Something I would have for a special celebration                                                                                         | 0.64      | 0.27  | 0.44  | 0.51   | 0.48  | 0.42  | -0.21 | -0.47 | -0.12 | -0.32  | -0.25 | 0.23  |
|            | Something I would have/give to my partner to show how much I care                                                                        | -0.11     | -0.22 | -0.40 | -0.23  | -0.12 | -0.29 | -0.02 | -0.13 | 0.08  | 0.04   | 0.14  | 0.43  |

**Table S5 cont.:** Utility weight (regression coefficient) for **chocolate** concepts per attributes according to age, gender and country of origin (Australia or China).

|            | Country                                                                                                | Australia |       |       |        |       |       | China |       |       |        |       |       |
|------------|--------------------------------------------------------------------------------------------------------|-----------|-------|-------|--------|-------|-------|-------|-------|-------|--------|-------|-------|
|            |                                                                                                        | Male      |       |       | Female |       |       | Male  |       |       | Female |       |       |
|            | Age group                                                                                              | 25-44     | 45-54 | ≥55   | 25-44  | 45-54 | ≥55   | 25-44 | 45-54 | ≥55   | 25-44  | 45-54 | ≥55   |
|            | Number of respondents                                                                                  | 136       | 44    | 66    | 155    | 49    | 78    | 144   | 40    | 15    | 143    | 40    | 14    |
| Attributes | Levels                                                                                                 |           |       |       |        |       |       |       |       |       |        |       |       |
| Product    | Premium quality                                                                                        | 0.46      | 0.37  | 0.37  | 0.33   | 0.42  | 0.37  | 0.85  | 0.75  | 0.69  | 0.78   | 0.71  | 1.18  |
|            | Certified organic                                                                                      | -0.03     | -0.48 | -0.11 | -0.02  | -0.26 | -0.08 | 0.46  | 0.23  | 0.29  | 0.30   | 0.43  | 0.25  |
|            | Full bodied dark chocolate                                                                             | 0.00      | 0.34  | 0.20  | 0.13   | 0.21  | 0.41  | -0.29 | -0.26 | 0.07  | -0.06  | 0.13  | -0.35 |
|            | Smooth plain slightly sweet milk chocolate                                                             | -0.24     | -0.23 | -0.19 | -0.26  | -0.31 | -0.30 | 0.05  | 0.33  | -0.42 | -0.28  | -0.04 | 0.24  |
|            | Full of chewy, crunch nuts with the chocolate                                                          | 0.17      | 0.10  | -0.03 | 0.17   | 0.29  | 0.01  | -0.55 | -0.73 | -0.10 | -0.33  | -0.77 | -1.37 |
|            | Filled with a soft smooth filling                                                                      | -0.37     | -0.10 | -0.25 | -0.35  | -0.36 | -0.40 | -0.53 | -0.31 | -0.53 | -0.41  | -0.45 | 0.06  |
| Package    | Silver wrap                                                                                            | -0.18     | -0.46 | -0.07 | -0.35  | -0.42 | -0.17 | -0.27 | -0.23 | -0.29 | -0.26  | -0.03 | 0.06  |
|            | Green wrap                                                                                             | -0.67     | -1.22 | -0.84 | -0.95  | -1.16 | -0.78 | -0.21 | -0.36 | -0.12 | -0.25  | -0.25 | -0.46 |
|            | Pouch                                                                                                  | -0.41     | -0.90 | -0.39 | -0.32  | -0.31 | -0.23 | -1.04 | -0.96 | -1.29 | -1.12  | -1.34 | -1.02 |
|            | Blister pack                                                                                           | -0.54     | -0.60 | -0.47 | -0.52  | -0.59 | -0.36 | -0.05 | 0.05  | 0.13  | -0.08  | -0.16 | -0.22 |
|            | Individual wrap                                                                                        | 0.42      | 0.80  | 0.56  | 0.64   | 0.68  | 0.68  | 0.52  | 0.68  | 0.42  | 0.64   | 0.59  | 0.80  |
|            | Gift pack                                                                                              | 1.38      | 2.38  | 1.22  | 1.50   | 1.81  | 0.86  | 1.05  | 0.81  | 1.14  | 1.08   | 1.19  | 0.84  |
| Ingredient | Cocoa from around the world is combined with Australian milk & sugar                                   | 0.60      | 0.59  | 0.68  | 0.63   | 0.53  | 0.73  | -0.19 | -0.15 | -0.19 | -0.12  | -0.35 | -0.13 |
|            | Cocoa from around the world is combined with Chinese milk & sugar                                      | -3.07     | -2.80 | -3.68 | -3.49  | -3.49 | -4.26 | -0.24 | -0.46 | -0.04 | -0.41  | 0.24  | -0.30 |
|            | Made from wild bush grown cocoa beans that provide the maximum health benefits from antioxidants       | 0.52      | 0.20  | 0.56  | 0.72   | 0.68  | 0.73  | 0.31  | 0.45  | 0.49  | 0.35   | 0.27  | 0.42  |
|            | Globally sourced cocoa blended with just a touch of sugar for a bitter chocolate, full of antioxidants | -0.10     | 0.43  | -0.15 | -0.18  | 0.08  | -0.18 | 0.00  | 0.21  | -0.06 | 0.12   | -0.02 | 0.29  |
|            | Single origin globally sourced cocoa beans                                                             | 0.04      | -0.45 | 0.24  | 0.19   | -0.02 | 0.24  | -0.03 | -0.25 | -0.32 | -0.27  | -0.09 | -0.39 |
|            | Australian cocoa beans blended with all Australian ingredients for a premium chocolate                 | 2.01      | 2.03  | 2.35  | 2.14   | 2.22  | 2.74  | 0.14  | 0.20  | 0.13  | 0.33   | -0.05 | 0.11  |



|            | Country                                                                                                                                                                     | Australia |       |       |        |       |       | China |       |       |        |       |       |
|------------|-----------------------------------------------------------------------------------------------------------------------------------------------------------------------------|-----------|-------|-------|--------|-------|-------|-------|-------|-------|--------|-------|-------|
|            | Gender                                                                                                                                                                      | Male      |       |       | Female |       |       | Male  |       |       | Female |       |       |
|            | Age group                                                                                                                                                                   | 25-44     | 45-54 | ≥55   | 25-44  | 45-54 | ≥55   | 25-44 | 45-54 | ≥55   | 25-44  | 45-54 | ≥55   |
|            | Number of respondents                                                                                                                                                       | 136       | 44    | 66    | 155    | 49    | 78    | 144   | 40    | 15    | 143    | 40    | 14    |
| Attributes | Levels                                                                                                                                                                      |           |       |       |        |       |       |       |       |       |        |       |       |
| Provenance | Prepared in a modern clean facility                                                                                                                                         | -0.88     | -0.58 | -0.68 | -0.95  | -0.81 | -0.97 | -0.37 | -0.38 | -0.83 | -0.39  | -0.30 | 0.41  |
|            | Authenticated, traceable back to farms where the ingredients came from                                                                                                      | 0.46      | 0.15  | 0.45  | 0.38   | 0.31  | 0.39  | 0.23  | 0.14  | 0.50  | 0.34   | 0.06  | -0.10 |
|            | Hand crafted by a chocolatier, with a unique recipe                                                                                                                         | -0.04     | 0.08  | 0.00  | 0.10   | 0.21  | 0.14  | 0.28  | 0.09  | 0.39  | 0.17   | 0.34  | -0.17 |
|            | Handcrafted using traditional methods                                                                                                                                       | 0.36      | -0.01 | 0.29  | 0.29   | 0.11  | 0.46  | -0.38 | -0.24 | -0.21 | -0.59  | -0.35 | -0.22 |
|            | Made with an uncompromising attitude to design and creation from years of expert knowledge                                                                                  | -0.02     | 0.11  | -0.05 | -0.03  | 0.01  | -0.09 | -0.09 | 0.09  | -0.06 | 0.02   | 0.04  | -0.08 |
|            | Limited rare edition, cocoa beans are picked and roasted in 24 hours from the moment of peak timing once a year, resulting in unique flavours from a special mixing process | 0.13      | 0.26  | 0.00  | 0.21   | 0.17  | 0.07  | 0.33  | 0.30  | 0.21  | 0.46   | 0.22  | 0.17  |
| Channel    | Available at all stores where food and beverages are sold                                                                                                                   | 1.07      | 1.06  | 1.30  | 1.04   | 1.18  | 1.26  | 0.05  | 0.21  | 0.03  | 0.16   | 0.00  | 0.36  |
|            | Available at my local store                                                                                                                                                 | 0.48      | 0.23  | 0.79  | 0.41   | 0.33  | 0.71  | -0.18 | -0.22 | 0.17  | -0.19  | -0.17 | -0.42 |
|            | Available in the supermarket                                                                                                                                                | 0.92      | 1.34  | 1.34  | 1.02   | 1.48  | 1.50  | 0.57  | 0.33  | 0.69  | 0.57   | 0.61  | 0.35  |
|            | Available at a small market / specialty store                                                                                                                               | 0.78      | 0.56  | 0.71  | 0.98   | 0.87  | 0.77  | -0.58 | -0.39 | -0.74 | -0.60  | -0.54 | -0.60 |
|            | Available online from a Chinese seller                                                                                                                                      | -3.33     | -3.07 | -4.00 | -3.52  | -3.69 | -4.10 | -0.01 | -0.10 | -0.56 | -0.23  | -0.09 | 0.23  |
|            | Available online from an Australian seller                                                                                                                                  | 0.09      | -0.11 | -0.14 | 0.08   | -0.17 | -0.15 | 0.15  | 0.17  | 0.41  | 0.30   | 0.19  | 0.08  |
| Occasion   | Something I would have by myself at home                                                                                                                                    | -0.61     | -0.43 | -0.71 | -0.66  | -0.61 | -0.86 | -0.45 | -0.48 | -0.25 | -0.34  | -0.35 | -0.25 |
|            | Something I would share with friends and family                                                                                                                             | 0.02      | 0.25  | 0.04  | 0.05   | 0.11  | -0.01 | 0.05  | -0.04 | -0.16 | 0.24   | 0.34  | 0.06  |
|            | Something I would share when I am out with friends and family                                                                                                               | -0.12     | -0.25 | -0.02 | -0.14  | 0.09  | -0.08 | 0.52  | 0.49  | 0.20  | 0.31   | 0.06  | 0.38  |
|            | Something I would have for a special occasion like a festival or holiday                                                                                                    | 0.06      | 0.03  | 0.25  | 0.17   | 0.11  | 0.37  | -0.15 | 0.08  | -0.02 | -0.32  | -0.21 | -0.31 |
|            | Something I would have for a special celebration                                                                                                                            | 0.77      | 0.58  | 0.67  | 0.66   | 0.59  | 0.67  | 0.04  | 0.00  | 0.05  | 0.00   | 0.07  | -0.09 |

|            | Country                                                           | Australia |       |       |        |       |       | China |       |      |        |       |      |
|------------|-------------------------------------------------------------------|-----------|-------|-------|--------|-------|-------|-------|-------|------|--------|-------|------|
|            | Gender                                                            | Male      |       |       | Female |       |       | Male  |       |      | Female |       |      |
|            | Age group                                                         | 25-44     | 45-54 | ≥55   | 25-44  | 45-54 | ≥55   | 25-44 | 45-54 | ≥55  | 25-44  | 45-54 | ≥55  |
|            | Number of respondents                                             | 136       | 44    | 66    | 155    | 49    | 78    | 144   | 40    | 15   | 143    | 40    | 14   |
| Attributes | Levels                                                            |           |       |       |        |       |       |       |       |      |        |       |      |
|            | Something I would have/give to my partner to show how much I care | -0.13     | -0.20 | -0.22 | -0.08  | -0.30 | -0.09 | -0.01 | -0.07 | 0.19 | 0.11   | 0.08  | 0.21 |
